# Supplementary material for: Outlier analyses of the Protein Data Bank archive using a probability-density-ranking approach
Source: PubMed Central journal article supplement (PMC6289109; doi:10.1038/sdata.2018.293), 2018-12-11
Supplement: sdata2018293-s1.pdf [file sdata2018293-s1.pdf]

RCSB Protein Data Bank

Supplementary Material:  
Outlier analyses of the  
Protein Data Bank archive  
using a Probability-  
Density-Ranking approach

Chenghua Shao, Zonghong Liu, Huanwang Yang,  
Sijian Wang, Stephen K. Burley

## Table of Contents

|                                                                                                   |    |
|---------------------------------------------------------------------------------------------------|----|
| Supplementary Results.....                                                                        | 2  |
| Impact of different kernel bandwidths and kernel types.....                                       | 2  |
| Comparison of probability density and PDR outliers of different experimental methods.....         | 2  |
| Supplementary Tables .....                                                                        | 4  |
| Table S1: Summary and PDR outlier boundaries of PDB data.....                                     | 4  |
| Table S2: 50%-95% Most Probable Ranges (MPR) of PDB data .....                                    | 5  |
| Table S3: Impact of bandwidth selection on calculating PDR outliers and MPRs.....                 | 6  |
| Supplementary Figures .....                                                                       | 7  |
| Figure S1: Distribution and PDR outliers of additional PDB data .....                             | 7  |
| Figure S1a .....                                                                                  | 8  |
| Figure S1b.....                                                                                   | 9  |
| Figure S1c .....                                                                                  | 10 |
| Figure S1d.....                                                                                   | 11 |
| Figure S1e .....                                                                                  | 12 |
| Figure S1f .....                                                                                  | 13 |
| Figure S1g.....                                                                                   | 14 |
| Figure S1h.....                                                                                   | 15 |
| Figure S1i.....                                                                                   | 16 |
| Figure S1j.....                                                                                   | 17 |
| Figure S1k.....                                                                                   | 18 |
| Figure S1l.....                                                                                   | 19 |
| Figure S2: Comparison of data distribution and outliers from different experimental methods ..... | 20 |
| Figure S2a .....                                                                                  | 21 |
| Figure S2b .....                                                                                  | 22 |
| Figure S2c .....                                                                                  | 23 |
| Figure S2d.....                                                                                   | 24 |
| Figure S2e .....                                                                                  | 25 |
| Figure S3: Probability density estimates based on different kernel bandwidth selections .....     | 26 |
| Figure S4: Comparison of results from Gaussian and Uniform/Box kernels .....                      | 27 |

## Supplementary Results

### Impact of different kernel bandwidths and kernel types

Probability Density Estimate is closely associated with the size and type of kernels it uses. Supplementary Table S3 and Figure S3 displays outcome and comparison of different bandwidth selections on 10,000 simple random sample of the estimated B factor. A special type of k-Nearest-Neighbor (kNN) kernel was also included in this comparison. Since the distributions from bandwidth between 1.3 and 2.0 were extremely similar, only some representatives from Table S3 were used for Figure S3 for the sake of clarity. For fixed-length bandwidths, greater bandwidth buries local features and thus leads to smoother probability density, with the central peak also lowered because the tail region receives more contribution from data-richer region covered by the broader bandwidth. On the other hand, the diminishing of local features may be undesired if one meant to study local cluster or outliers. The 5% PDR outliers are fairly consistent for all bandwidth selections, whereas the 1% PDB outliers are relatively different at smaller bandwidths due to the presence of local data clusters that are smoothed under greater bandwidth. We concluded that bigger bandwidth and 5% PDR outliers should be used if the goal is to have a crude range and outlier assessment, whereas smaller bandwidth and 1% PDR outliers should be used if one needs to study local distribution features, and the bandwidth from Equation (2) is a good starting bandwidth to use.

The two-step adaptive kernel estimation ( $h_{\text{var}}$  in the plot) has the most smoothed distribution, because the local bandwidth is inversely proportional to the density estimate at the location -- the tail region receives much bigger bandwidth whereas the peak region receives smaller bandwidth. The other adaptive kernel, the kNN method, demonstrated more problems: it is sensitive to local features even at the peak, and produces overestimated density at the tail region. The overall estimate by kNN method is also not density function due to the infinite integral. Therefore, we concluded the two-step adaptive kernel and kNN methods are not appropriate for studying local distribution and outliers of PDB data.

We also accessed the impact of other different types of kernels, in addition to kNN. Figure S4 shows the comparison of the probability density estimates and PDR outliers between Uniform (Rectangular or Box) kernel and Gaussian kernel, with either the same or different bandwidths. The results demonstrated that, among all Euclidean distance-based kernels with fixed-length bandwidth, the types of kernels have less significant impact than the size of bandwidth in terms of overall shape of the distribution and PDR outliers. Uniform kernel, due to its non-smooth nature does produce non-smooth density estimates at certain regions, and therefore needs greater bandwidth to have a smoother density estimates (Figure S4b & S4d).

### Comparison of probability density and PDR outliers of different experimental methods

As indicated in the conditional data distribution of the results, to have a homogeneous data set for PDR outliers is crucial for its usefulness. Since PDB is an experiment-based archive, the very first factor being considered is the type of experimental method. 18 of the 22 data sets being described here are specific to MX method only. Four data sets (Molecular Weight, Clashscore, Ramachandran Violations, and Rotamer Violations) are pertaining to all three experimental methods: Macromolecular Crystallography (MX), Electron Microscopy (EM), and Nuclear Magnetic Resonance Spectroscopy (NMR). The comparison of method-specific data distributions is illustrated in Figure S2.

Figure S2a shows the overlay of the probability density estimates of Clashscore from all three methods. For MX method, most data are concentrated at the relatively lower Clashscore region, with only 3.2% data beyond the score of 34 that is the 5% PDR outlier boundaries for the data from all three methods (Table S1). Whereas for

both EM and NMR methods there are ~20% data greater than the score of 34. Then the data were separated based on methods, and the Clashscore distributions and PDR outliers for each method were calculated separately and displayed in Figure S2b. The boundaries for EM and NMR methods are much higher than that for MX method.

Figures S2c and S2d display the method-specific distributions and PDR outliers for Ramachandran and Rotamer Violations. Both figures demonstrate different distributions and PDB outliers for different methods. Figure 3 in the results section is a display of Molecular Weight in crystal's asymmetric unit for MX method only, whereas Figure S2e demonstrates the distributions for all methods. Because there is no asymmetric unit for most of EM and NMR structures, all atoms of the modeled sample were added together for EM and NMR structures as their Molecular Weight in comparison to the asymmetric unit Molecular Weight of MX structures. The results show that NMR method was mostly used to study molecules of size below 20 kDa, and common MX research targets could go up to 200 kDa, whereas EM is frequently applied on big molecular complexes such as 2000 kDa target.

## Supplementary Tables

Table S1: Summary and PDR outlier boundaries of PDB data

| PDB data item                                                          | Number of Entries | Parametric fitting |          |          |          | Percentile |         |         |        |          |         |          |          | Probability Density |                 |         |                 |        |
|------------------------------------------------------------------------|-------------------|--------------------|----------|----------|----------|------------|---------|---------|--------|----------|---------|----------|----------|---------------------|-----------------|---------|-----------------|--------|
|                                                                        |                   | mean               | sd       | skewness | kurtosis | median     | Q1      | Q3      | IQR    | 0.5%     | 99.5%   | 2.5%     | 97.5%    | mode                | 1% PDR Boundary |         | 5% PDR Boundary |        |
|                                                                        |                   |                    |          |          |          |            |         |         |        |          |         |          |          |                     | Low             | High    | Low             | High   |
| Rfree                                                                  | 123849            | 0.236              | 0.039    | 0.174    | 3.955    | 0.236      | 0.21    | 0.261   | 0.051  | 0.133    | 0.352   | 0.158    | 0.314    | 0.235               | 0.127           | 0.344   | 0.157           | 0.312  |
| clashscore                                                             | 141317            | 10.784             | 16.323   | 8.719    | 214.782  | 6.31       | 3.28    | 12.25   | 8.97   | 0        | 100.564 | 0.45     | 49.121   | 3.1                 | NA              | 75.36   | NA              | 34     |
| percent ramachandran violations(%)                                     | 137731            | 0.903              | 2.333    | 7.374    | 106.487  | 0.18       | 0       | 0.76    | 0.76   | 0        | 14.904  | 0        | 6.82     | 0                   | NA              | 10.82   | NA              | 4.29   |
| reflection data multiplicity                                           | 106032            | 8.031              | 104.402  | 190.324  | 43933.28 | 5.1        | 3.6     | 7.3     | 3.7    | 1.63     | 41.5    | 2        | 20       | 3.651               | NA              | 28.1    | 1.3             | 14.75  |
| molecular weight in asymmetric unit(Da)                                | 124243            | 98753.36           | 479589.5 | 99.797   | 16570.05 | 50667.4    | 30385.3 | 94788.3 | 64403  | 3942.013 | 1070175 | 10675.64 | 379722.5 | 32818.2             | NA              | 501148  | NA              | 245404 |
| crystal Matthews coefficient(Å <sup>3</sup> /Da)                       | 128668            | 2.671              | 0.781    | 21.354   | 2156.319 | 2.5        | 2.21    | 2.91    | 0.7    | 1.67     | 5.85    | 1.86     | 4.52     | 2.273               | 1.476           | 5.32    | 1.717           | 4.1    |
| average B factor of protein atoms(Å <sup>2</sup> )                     | 111964            | 38.115             | 27.168   | 3.443    | 31.187   | 31.062     | 21.129  | 46.812  | 25.683 | 7.531    | 170.105 | 10.678   | 106.292  | 22.192              | 1.89            | 136.142 | 5.776           | 87.105 |
| average B factor of nucleic acid atoms(Å <sup>2</sup> )                | 6933              | 64.843             | 47.316   | 2.633    | 16.816   | 53.267     | 34.598  | 82.236  | 47.639 | 6.878    | 288.708 | 11.779   | 187.626  | 37.913              | NA              | 238.499 | 1               | 150.16 |
| average B factor of ligand atoms(Å <sup>2</sup> )                      | 86066             | 45.971             | 29.393   | 2.718    | 21.531   | 39.466     | 26.85   | 57.158  | 30.308 | 7.28     | 176.67  | 11.747   | 119.456  | 30.54               | 0.603           | 153.385 | 5.69            | 99.84  |
| average B factor of water atoms(Å <sup>2</sup> )                       | 105527            | 37.594             | 12.915   | 3.082    | 62.991   | 35.722     | 29.528  | 43.53   | 14.002 | 11.676   | 86.82   | 18.67    | 66.574   | 33.007              | 8.606           | 81.05   | 16.359          | 63.12  |
| B factor estimated from Wilson plot(Å <sup>2</sup> Depositor-reported) | 53333             | 34.792             | 26.205   | 5.866    | 117.799  | 27.71      | 18.9    | 43.2    | 24.3   | 5.1      | 141.229 | 9        | 95.153   | 19.58               | NA              | 118.31  | 4.123           | 81.4   |
| B factor estimated from Wilson plot(Å <sup>2</sup> PDB-calculated)     | 116209            | 33.923             | 26.48    | 5.509    | 79.556   | 27.149     | 18.53   | 41.354  | 22.824 | 6.54     | 153.806 | 9.24     | 95.018   | 19.383              | 1.397           | 125.246 | 5.001           | 78.387 |
| crystal solvent percentage(%)                                          | 128714            | 51.363             | 10.105   | 0.172    | 3.601    | 50.51      | 44.39   | 57.72   | 13.33  | 25.306   | 79      | 33.67    | 72.78    | 49.42               | 27.6            | 80.4    | 33.2            | 72.3   |
| crystal mosaicity                                                      | 2660              | 0.489              | 0.619    | 16.837   | 491.398  | 0.376      | 0.17    | 0.67    | 0.5    | 0.04     | 2.169   | 0.05     | 1.517    | 0.149               | NA              | 1.853   | NA              | 1.267  |
| Rfree minus Rwork                                                      | 122982            | 0.041              | 0.017    | 0.787    | 5.28     | 0.039      | 0.029   | 0.051   | 0.022  | 0.005    | 0.1     | 0.013    | 0.08     | 0.037               | 0.001           | 0.094   | 0.01            | 0.076  |
| reflection high resolution limit(Å)                                    | 130858            | 2.202              | 1.156    | 25.495   | 1161.253 | 2.07       | 1.8     | 2.5     | 0.7    | 1        | 5.8     | 1.2      | 3.5      | 1.978               | 0.8             | 4.1     | 1.084           | 3.3    |
| reflection data indexing chi-square                                    | 11822             | 1.285              | 1.303    | 33.78    | 1627.396 | 1.046      | 0.982   | 1.301   | 0.319  | 0.52     | 5.207   | 0.765    | 2.844    | 1.007               | 0.306           | 3.764   | 0.597           | 2.446  |
| reflection data Intensity/Sigma                                        | 103377            | 18.85              | 245.217  | 166.713  | 30993.2  | 14.1       | 9.89    | 20.3    | 10.41  | 2.3      | 63.1    | 4.6      | 43.9     | 11.008              | 0.097           | 54.245  | 2.25            | 37.4   |
| reflection data Rmerge                                                 | 88441             | 0.096              | 0.342    | 74.438   | 8457.843 | 0.077      | 0.059   | 0.101   | 0.042  | 0.021    | 0.44    | 0.034    | 0.207    | 0.061               | 0.003           | 0.287   | 0.024           | 0.173  |
| reflection data completeness(%)                                        | 122049            | 96.37              | 7.004    | -6.938   | 78.235   | 98.6       | 95.7    | 99.7    | 4      | 61.124   | 100     | 80.8     | 100      | 99.78               | 74.5            | NA      | 86.48           | NA     |
| percent rotamer violations(%)                                          | 137522            | 4.834              | 6.452    | 3.224    | 17.618   | 2.68       | 1.12    | 5.88    | 4.76   | 0        | 38.844  | 0        | 24.65    | 0.92                | NA              | 33.08   | NA              | 17.19  |
| percent RSRZ violations(%)                                             | 113450            | 3.976              | 4.196    | 5.377    | 82.073   | 2.93       | 1.34    | 5.4     | 4.06   | 0        | 21.05   | 0        | 13.66    | 1.16                | NA              | 17.46   | NA              | 11.04  |

Table S2: 50%-95% Most Probable Ranges (MPR) of PDB data

| PDB data item                                                          | 50%MPR               | 60%MPR               | 70%MPR               | 80%MPR              | 90%MPR             | 95%MPR             |
|------------------------------------------------------------------------|----------------------|----------------------|----------------------|---------------------|--------------------|--------------------|
| Rfree                                                                  | 0.21--<br>0.261      | 0.204--<br>0.268     | 0.196--<br>0.275     | 0.188--<br>0.285    | 0.173--<br>0.299   | 0.157--<br>0.312   |
| clashscore                                                             | 1.01--<br>7.11       | 0.56--<br>8.69       | 0.14--<br>11.07      | 0--<br>14.49        | 0--<br>22.75       | 0--<br>34          |
| percent ramachandran violations(%)                                     | 0--<br>0.15          | 0--<br>0.34          | 0--<br>0.57          | 0--<br>1.03         | 0--<br>2.32        | 0--<br>4.29        |
| reflection data multiplicity                                           | 2.758--<br>5.05      | 2.69--<br>5.5        | 2.5--<br>7.442       | 1.65--<br>8.3       | 1.472--<br>11.55   | 1.3--<br>14.75     |
| molecular weight in asymmetric unit(Da)                                | 13396.9--<br>55743.2 | 10517.1--<br>67565.6 | 7560.54--<br>85235.2 | 4979.67--<br>111249 | 649.76--<br>168925 | 468.55--<br>245404 |
| crystal Matthews coefficient(Å <sup>3</sup> /Da)                       | 2.036--<br>2.63      | 2--<br>2.77          | 1.947--<br>2.91      | 1.874--<br>3.15     | 1.787--<br>3.61    | 1.717--<br>4.1     |
| average B factor of protein atoms(Å <sup>2</sup> )                     | 13.761--<br>34.708   | 12.417--<br>39.232   | 11.071--<br>45.093   | 9.582--<br>53.508   | 7.493--<br>69.261  | 5.776--<br>87.105  |
| average B factor of nucleic acid atoms(Å <sup>2</sup> )                | 22.445--<br>62.349   | 18.213--<br>69.934   | 14.821--<br>81.117   | 11.302--<br>95.812  | 5.058--<br>119.21  | 1--<br>150.16      |
| average B factor of ligand atoms(Å <sup>2</sup> )                      | 19.029--<br>45.975   | 16.75--<br>50.74     | 14.357--<br>56.94    | 11.845--<br>65.87   | 8.405--<br>81.915  | 5.69--<br>99.84    |
| average B factor of water atoms(Å <sup>2</sup> )                       | 27.21--<br>40.625    | 25.737--<br>42.744   | 24.086--<br>45.515   | 22.218--<br>49.378  | 19.175--<br>55.94  | 16.359--<br>63.12  |
| B factor estimated from Wilson plot(Å <sup>2</sup> Depositor-reported) | 12.45--<br>31.3      | 11.064--<br>35.77    | 9.52--<br>41.55      | 7.892--<br>50.76    | 5.9--<br>66.61     | 4.123--<br>81.4    |
| B factor estimated from Wilson plot(Å <sup>2</sup> PDB-calculated)     | 12.254--<br>30.513   | 10.877--<br>34.295   | 9.462--<br>39.519    | 8.116--<br>47.66    | 6.334--<br>62.421  | 5.001--<br>78.387  |
| crystal solvent percentage(%)                                          | 42.62--<br>55.63     | 41.18--<br>57.41     | 39.83--<br>59.88     | 38.18--<br>63.22    | 35.89--<br>68.58   | 33.2--<br>72.3     |
| crystal mosaicity                                                      | 0.04--<br>0.387      | 0.03--<br>0.482      | 0.03--<br>0.6        | 0.03--<br>0.739     | 0.03--<br>0.989    | 0.03--<br>1.267    |
| Rfree minus Rwork                                                      | 0.027--<br>0.048     | 0.024--<br>0.051     | 0.021--<br>0.055     | 0.018--<br>0.059    | 0.014--<br>0.067   | 0.01--<br>0.076    |
| reflection high resolution limit(Å)                                    | 1.656--<br>2.33      | 1.585--<br>2.421     | 1.484--<br>2.592     | 1.447--<br>2.8      | 1.26--<br>3.075    | 1.084--<br>3.3     |
| reflection data indexing chi-square                                    | 0.922--<br>1.097     | 0.883--<br>1.156     | 0.842--<br>1.297     | 0.788--<br>1.536    | 0.723--<br>1.98    | 0.597--<br>2.446   |
| reflection data Intensity/Sigma                                        | 7.2--<br>16.28       | 6.36--<br>17.9       | 5.59--<br>20.18      | 4.64--<br>23.6      | 3.4--<br>30.2      | 2.25--<br>37.4     |
| reflection data Rmerge                                                 | 0.048--<br>0.088     | 0.045--<br>0.094     | 0.04--<br>0.103      | 0.036--<br>0.116    | 0.03--<br>0.141    | 0.024--<br>0.173   |
| reflection data completeness(%)                                        | 98.6--<br>100        | 97.8--<br>100        | 96.5--<br>100        | 94.5--<br>100       | 90.8--<br>100      | 86.48--<br>100     |
| percent rotamer violations(%)                                          | 0--<br>2.68          | 0--<br>3.65          | 0--<br>5             | 0--<br>7.03         | 0--<br>11.22       | 0--<br>17.19       |
| percent RSRZ violations(%)                                             | 0.05--<br>3.33       | 0--<br>3.74          | 0--<br>4.76          | 0--<br>6.16         | 0--<br>8.59        | 0--<br>11.04       |

Table S3: Impact of bandwidth selection on calculating PDR outliers and MPRs

| Name    | Bandwidth | 1% PDR outliers<br>left bound | 1% PDR outliers<br>right bound | 5% PDR outliers<br>left bound | 5% PDR outliers<br>right bound | 50% MPR width |
|---------|-----------|-------------------------------|--------------------------------|-------------------------------|--------------------------------|---------------|
| h.iqr   | 2.8       | NA                            | 117.652                        | 3.655                         | 77.068                         | 17.999        |
| h.amise | 9.767     | NA                            | 121.531                        | NA                            | 76.661                         | 18.456        |
| h.bcv   | 1.726     | NA                            | 112.135                        | 4.976                         | 77.388                         | 17.941        |
| h.ccv   | 1.564     | NA                            | 112.135                        | 5.063                         | 77.464                         | 17.945        |
| h.mcv   | 1.968     | NA                            | 112.942                        | 4.562                         | 77.217                         | 17.94         |
| h.mlcv  | 4.994     | NA                            | 121.531                        | NA                            | 76.661                         | 17.876        |
| h.tcv   | 1.574     | NA                            | 112.135                        | 5.063                         | 77.464                         | 17.945        |
| h.ucv   | 1.365     | 1.859                         | 112.135                        | 5.188                         | 77.464                         | 17.947        |
| h.knn   |           | NA                            | 105.308                        | NA                            | 76.661                         | 17.924        |
| h.var   |           | NA                            | 121.531                        | NA                            | 76.661                         | 18.328        |

Different kernel bandwidths are applied to the same data set of 10000 sample of B factor values from Wilson Plot, in the unit of  $\text{Å}^2$ . h.knn and h.var are variable-length and the rest are fixed-length bandwidth with size indicated in the 2<sup>nd</sup> column. Each bandwidth is named by letter h, a dot, followed by the abbreviation of the method: h.iqr based on IQR as indicated in Equation (2); h.amise, based on Asymptotic Mean Integrated Squared Error; h.bcv, based on Biased Cross-Validation; h.ccv, based on Complete Cross-Validation; h.mcv, based on Modified Cross-Validation; h.mlcv, based on Maximum-Likelihood Cross-Validation; h.tcv, Trimmed Cross-Validation; h.ucv, Unbiased (Least-Squares) Cross-Validation; h.var, Variable kernel density estimator; h.knn, k-Nearest Neighbor used in Equation (3). The left/right bound is decided in the following way: starting from mode and move to lower (left) tail or upper (right) tail, the 1<sup>st</sup> observation with estimated probability density lower than threshold at the lower tail is the left bound, and 1<sup>st</sup> at the upper tail is the right bound. "NA" indicates there is no outlier at the specified end for the threshold.

## Supplementary Figures

### Figure S1: Distribution and PDR outliers of additional PDB data

Distribution of the following additional PDB data sets: (a) B factor estimated from Wilson Plot ( $\text{\AA}^2$ , PDB-calculated); (b) B factor estimated from Wilson Plot ( $\text{\AA}^2$ , Depositor-reported); (c) Crystal solvent percent (%); (d) Crystal mosaicity; (e) Rfree minus Rwork; (f) Reflection high resolution limit ( $\text{\AA}$ ); (g) Reflection data indexing Chi-square; (h) Reflection data Intensity/Sigma; (i) Reflection data Rmerge; (j) Reflection data completeness (%); (k) Percent Rotamer violations(%); (l) Percent RSRZ violations (%). Each graph contains three panels showing 5% PDR outliers (upper left), 1% PDR outliers (upper right), and Normal Q-Q plot (bottom left). Figure title indicates the unit of the measurement if applicable. PDR outlier regions are colored in red and non-outlier regions in blue.



Figure S1a

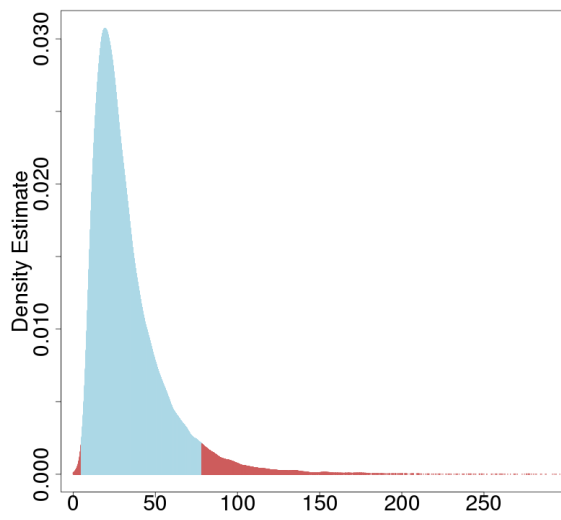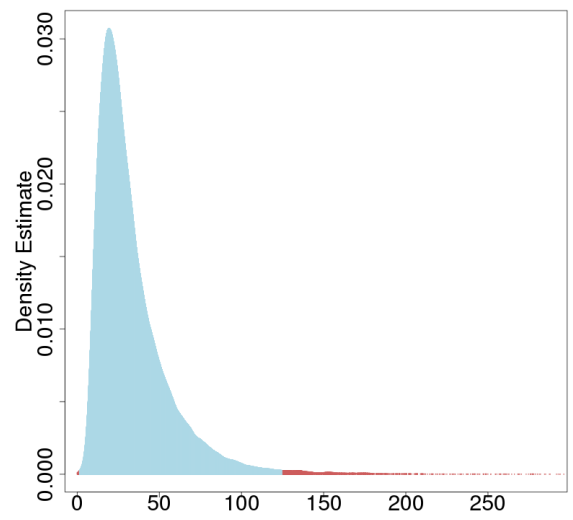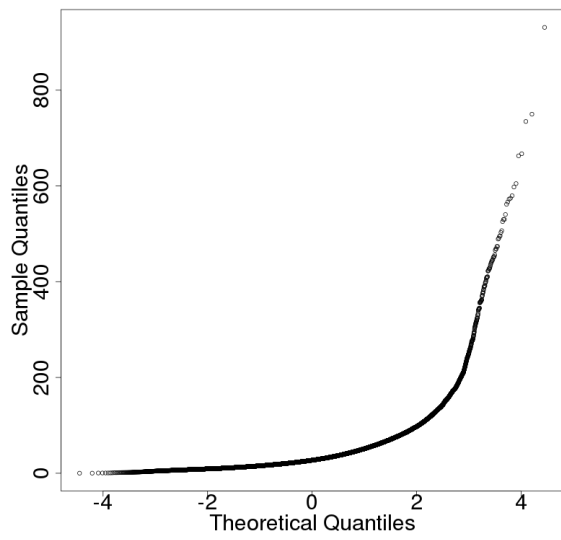

Figure S1b

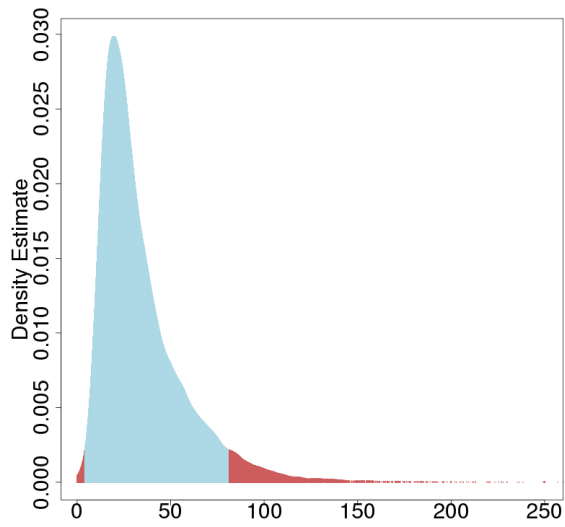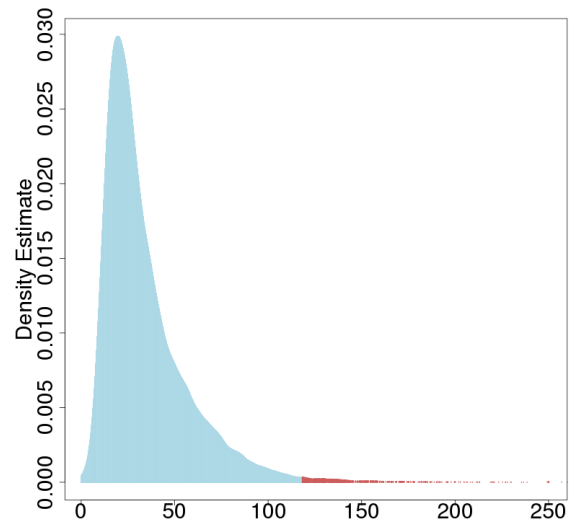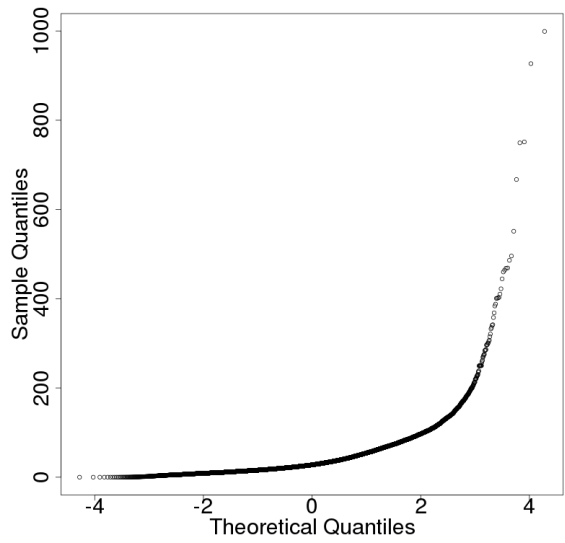

Figure S1c

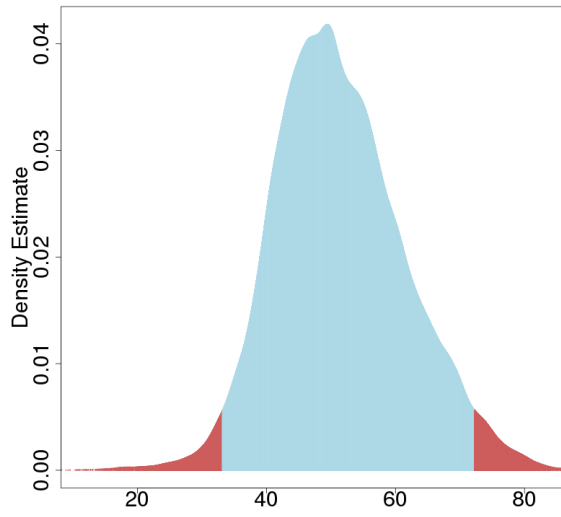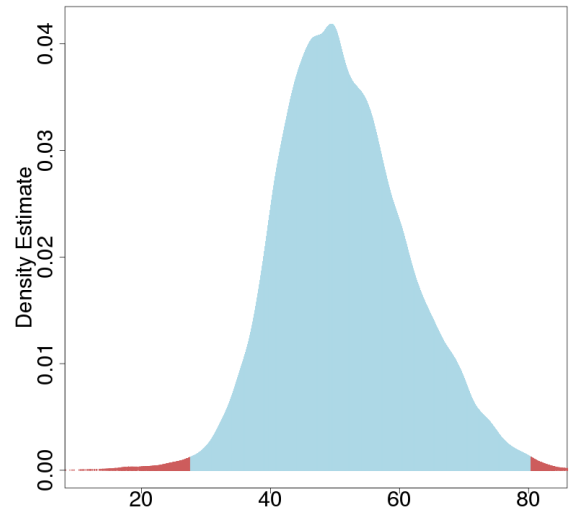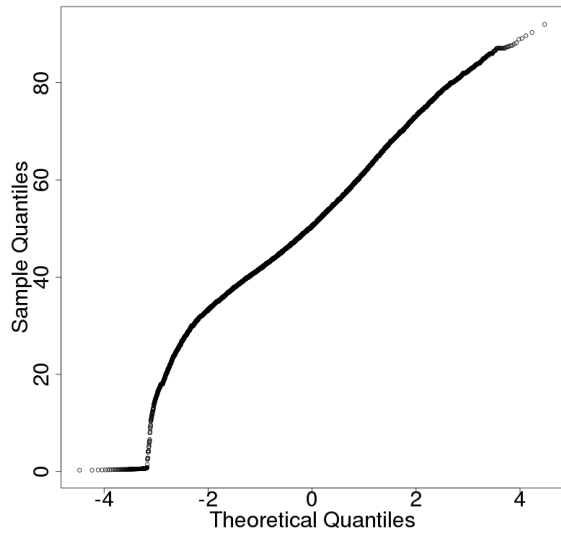

Figure S1d

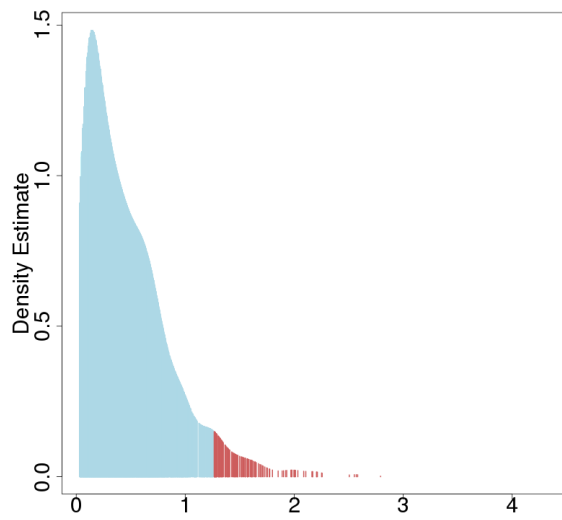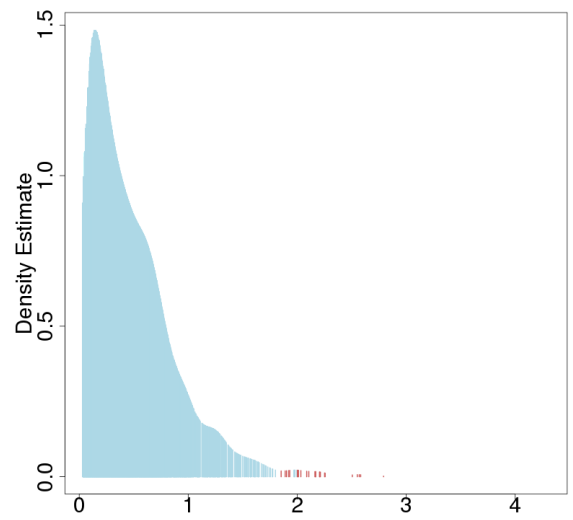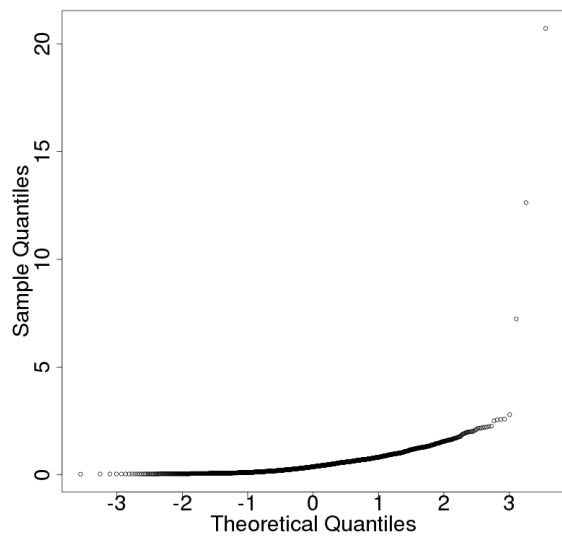

Figure S1e

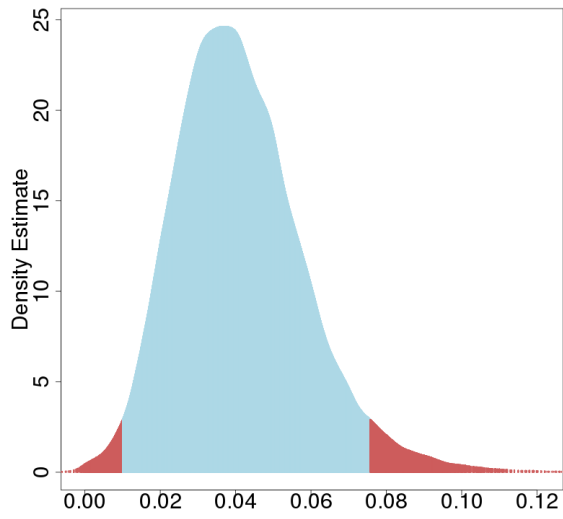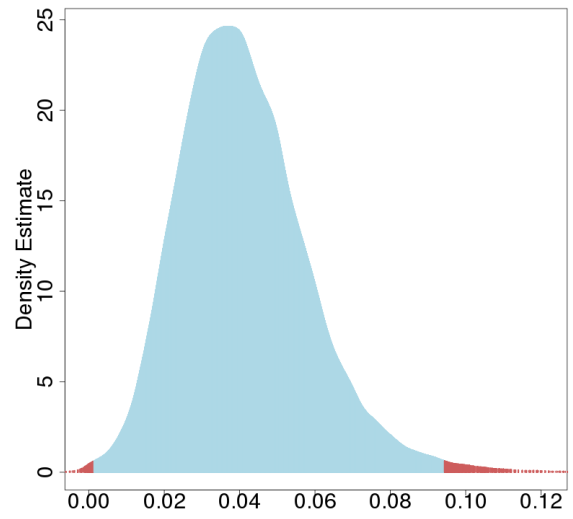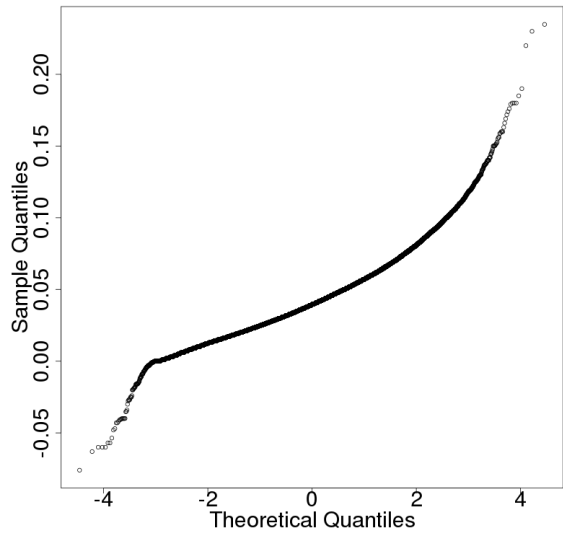

Figure S1f

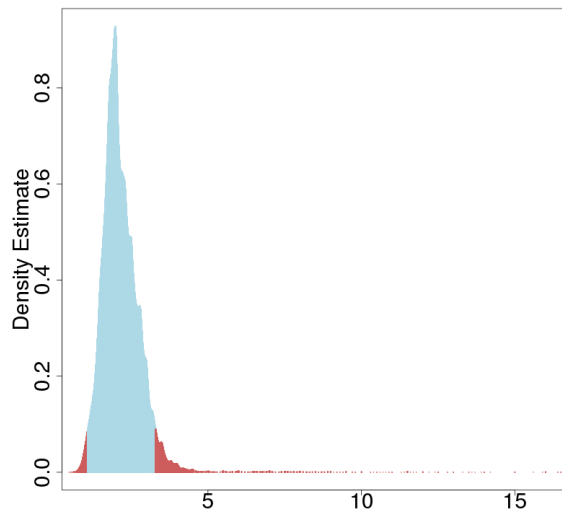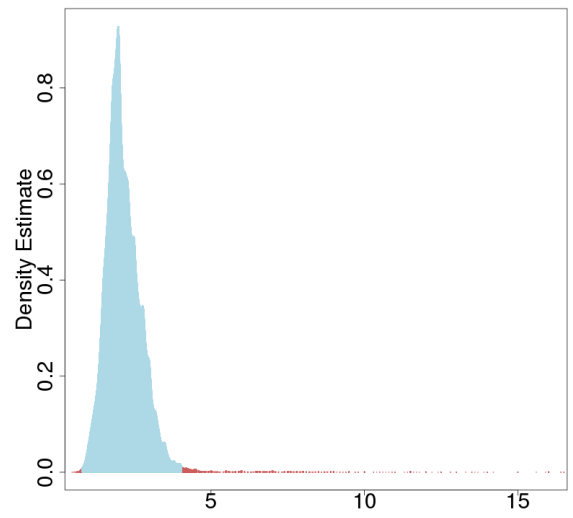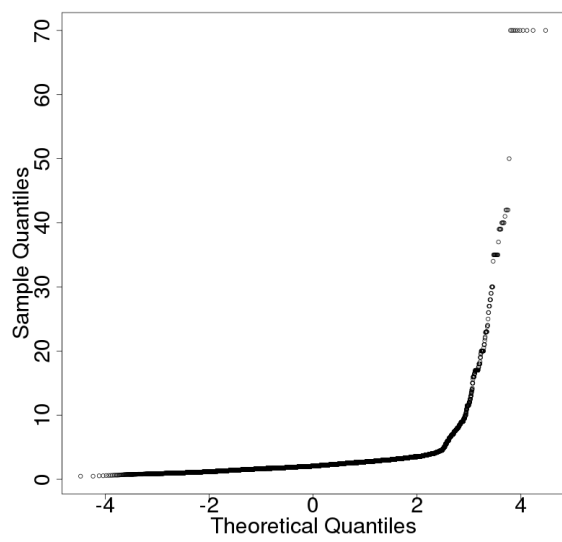

Figure S1g

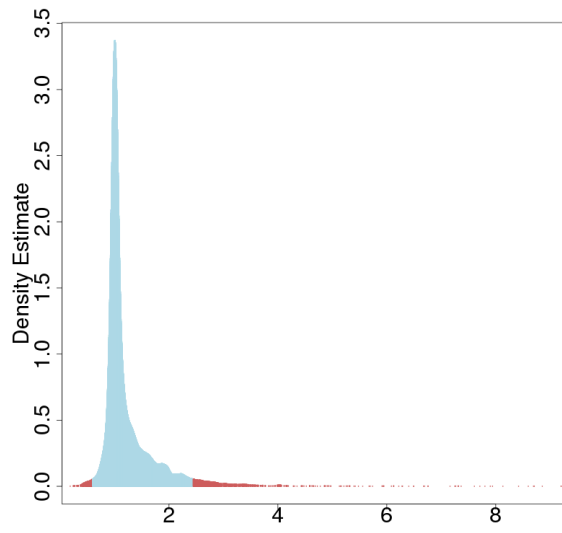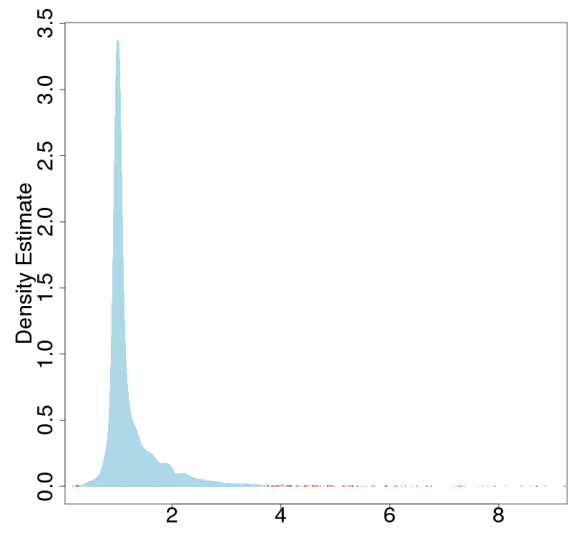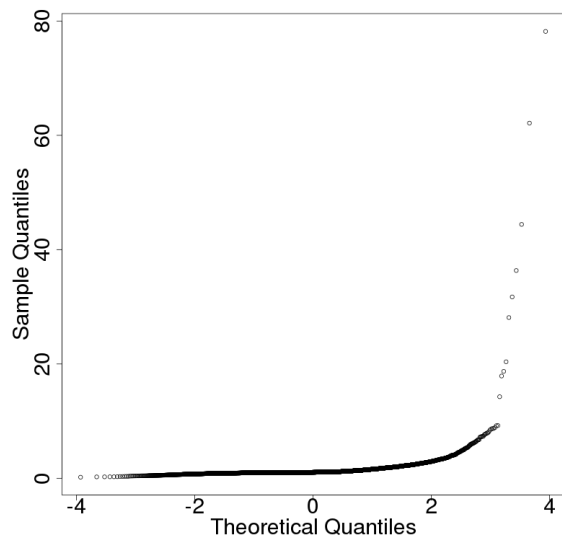

Figure S1h

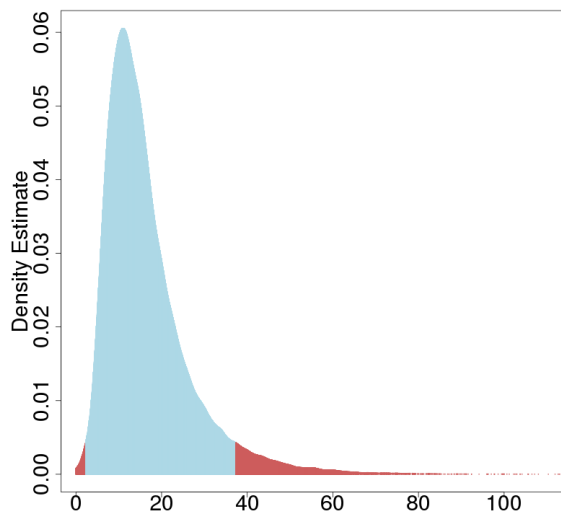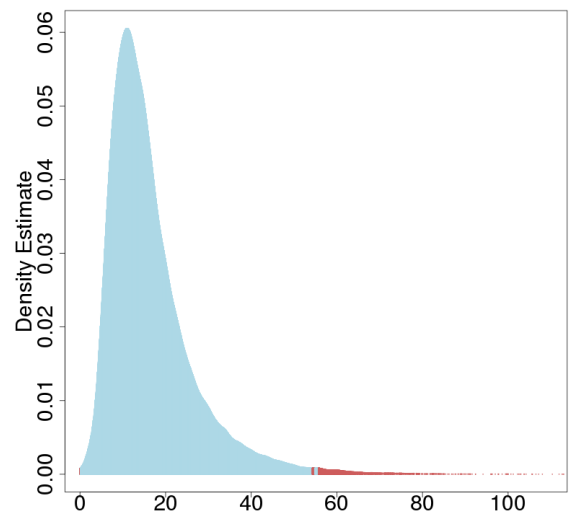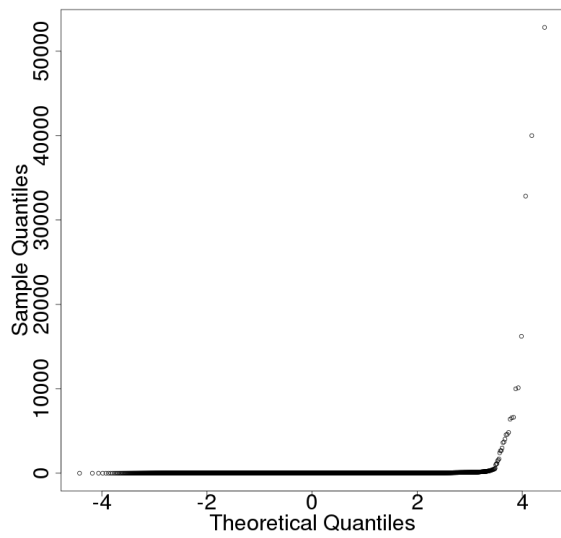



Figure S1i

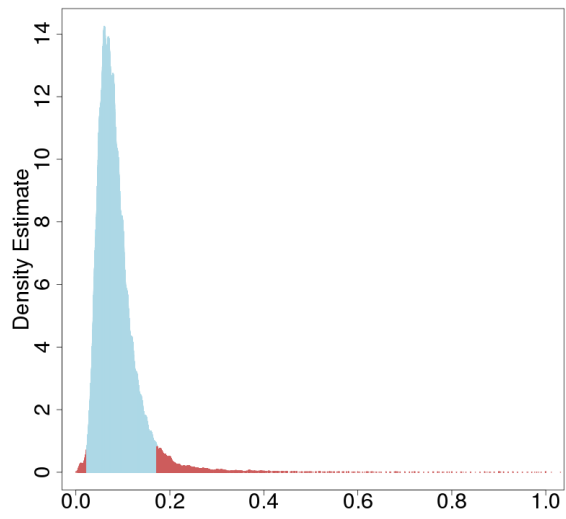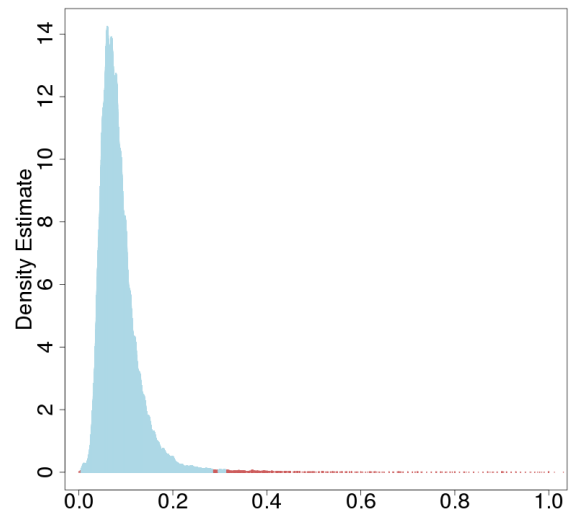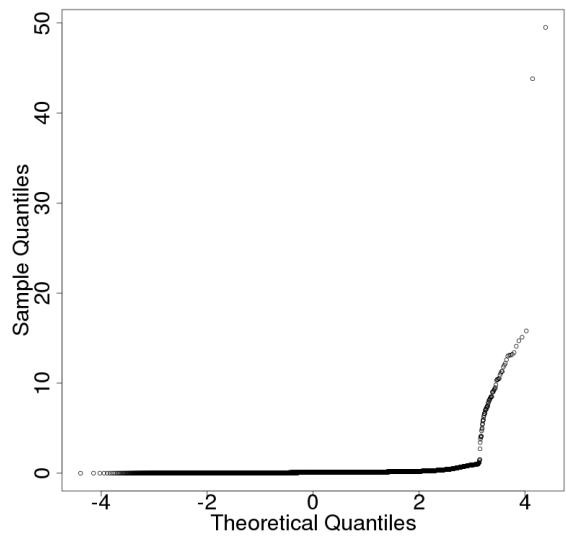

Figure S1j

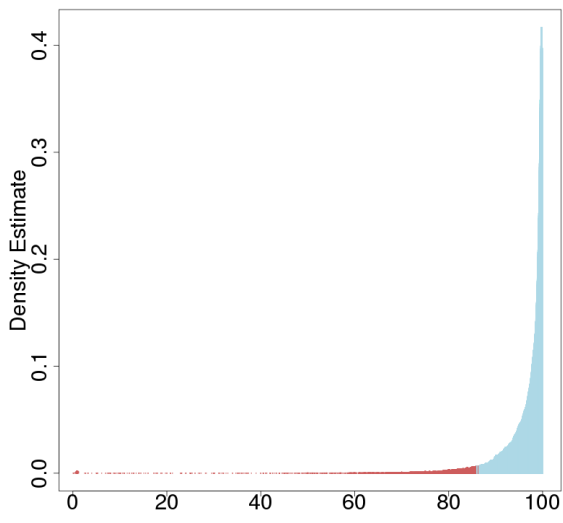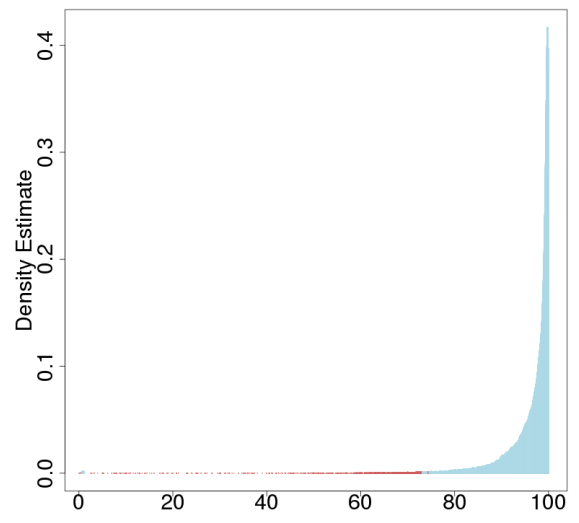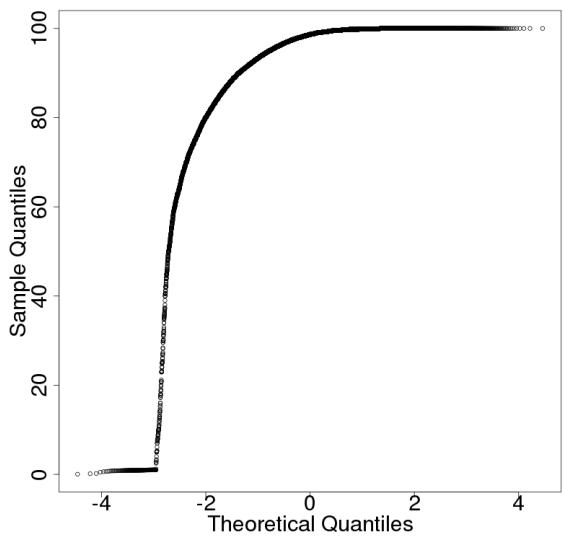

Figure S1k

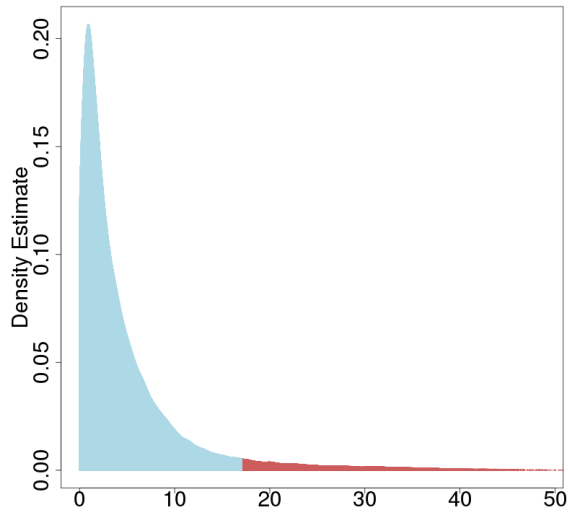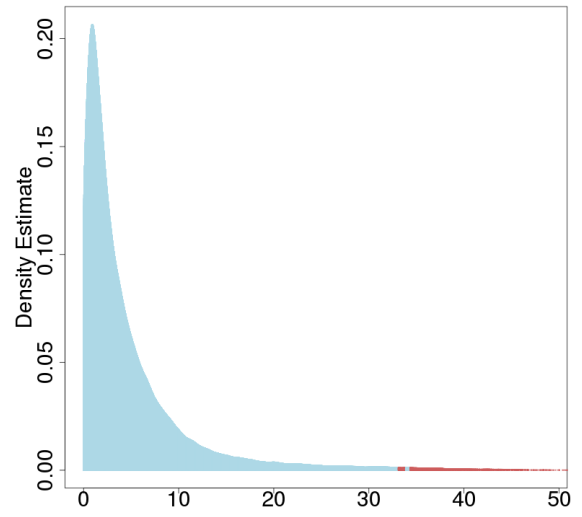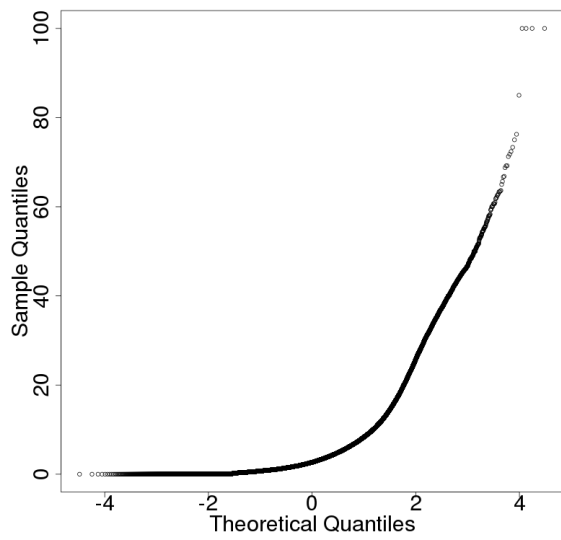

Figure S1I

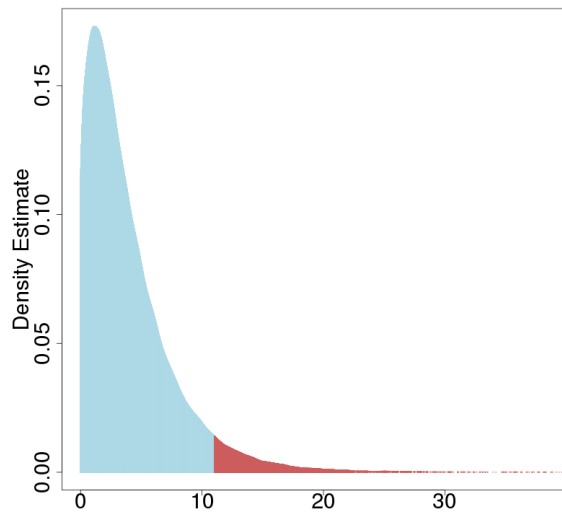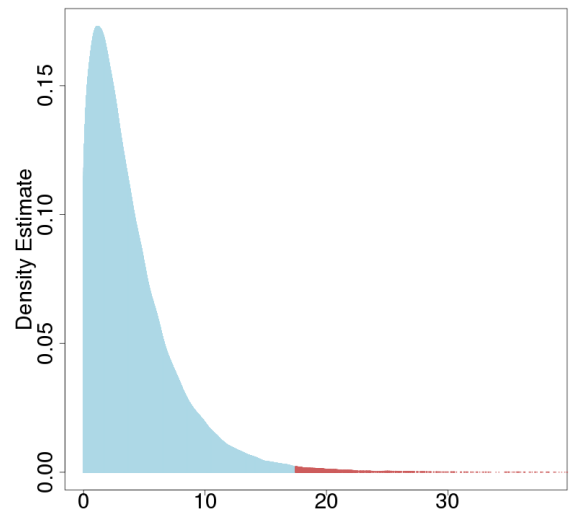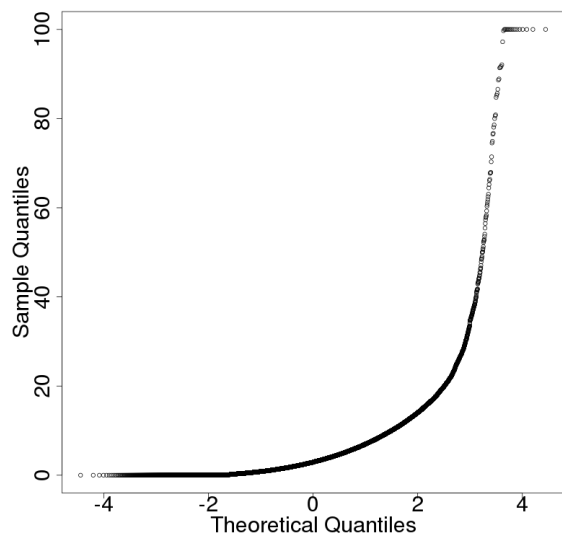

## Figure S2: Comparison of data distribution and outliers from different experimental methods

(a) Overlay of Clashscore data from three experimental methods: Macromolecular Crystallography (MX), Electron Microscopy (EM), and Nuclear Magnetic Resonance Spectroscopy (NMR). (b-e) Method-specific distribution of Clashscore, Ramachandran violations (%), Rotamer violations (%) and Molecular Weight (Da), respectively, with data from each method plotted in separate panels. Figure title indicates the unit of measurement if applicable. PDR outlier region is colored in red and non-outlier region in blue. Because the data range for different method can be very different, each panel in figures b-e displays data at different range, and overlay is only made for Clashscore. Data from hybrid methods were not included.

Figure S2a

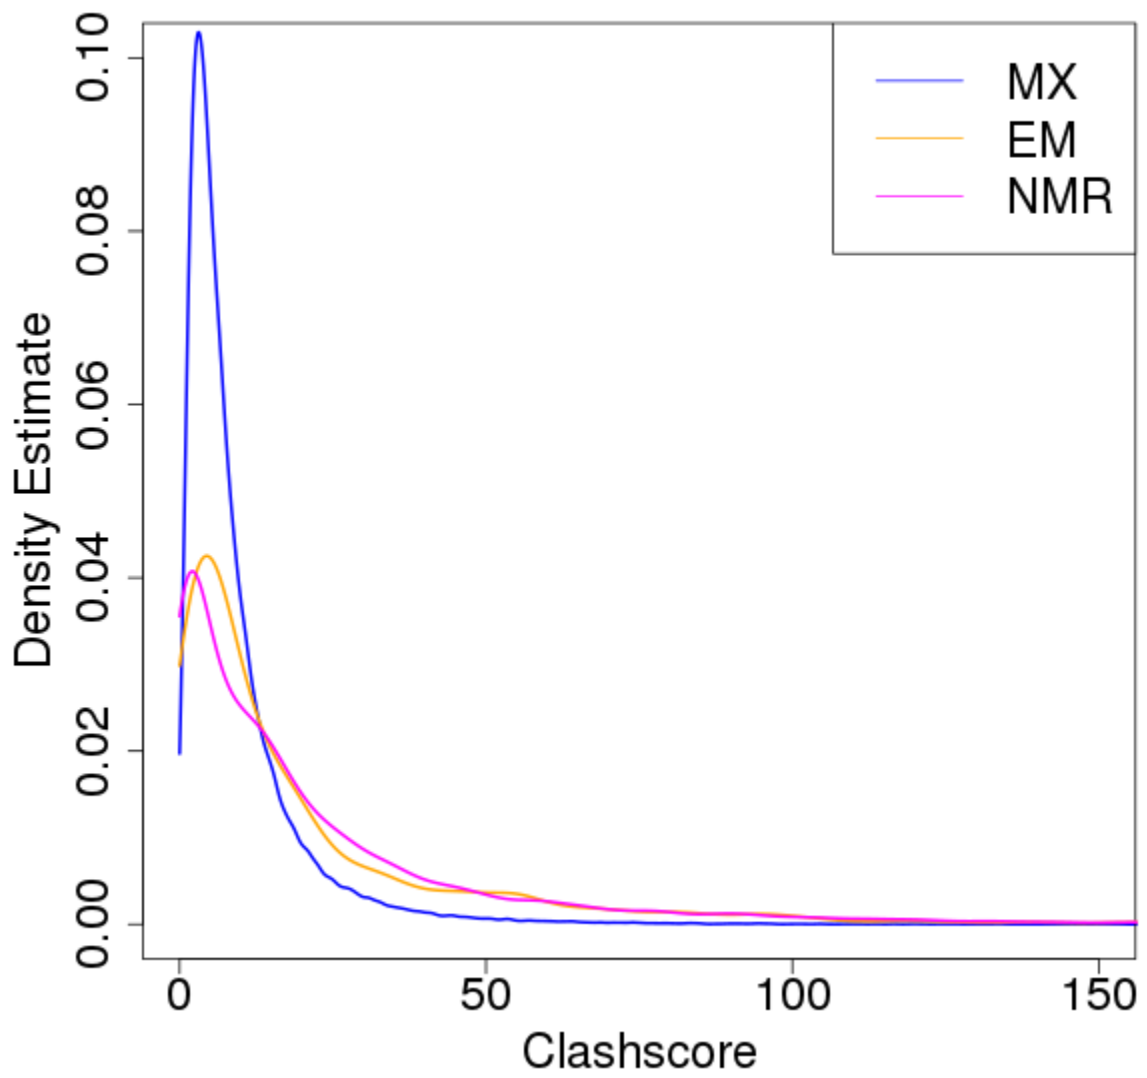

Figure S2b

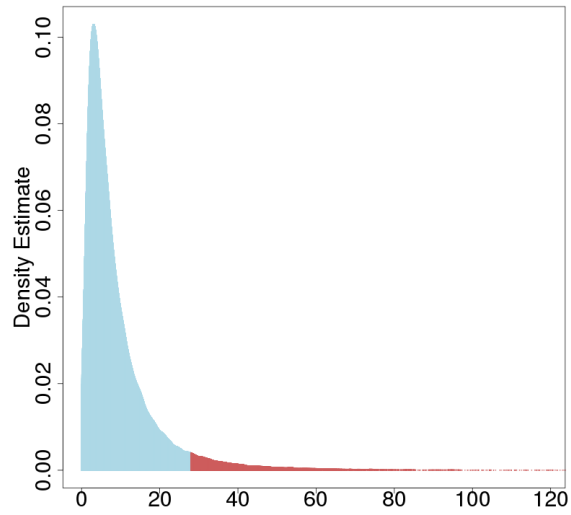

MX

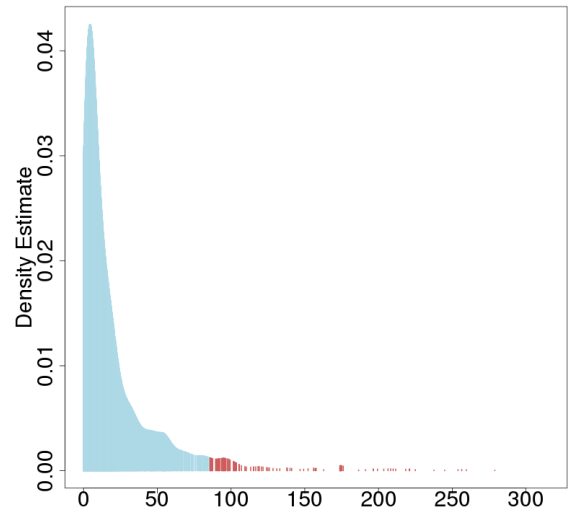

EM

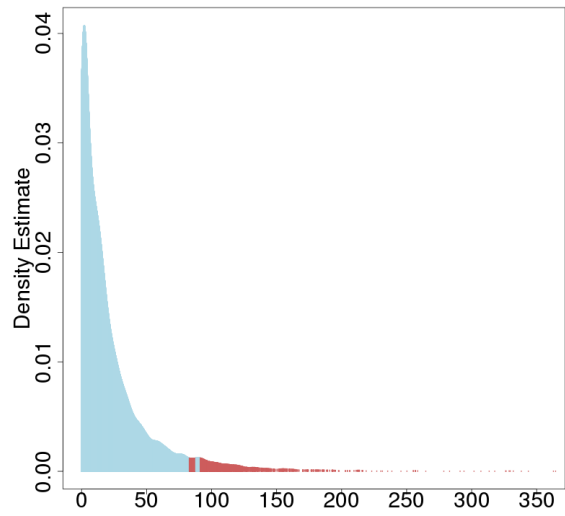

NMR

Figure S2c

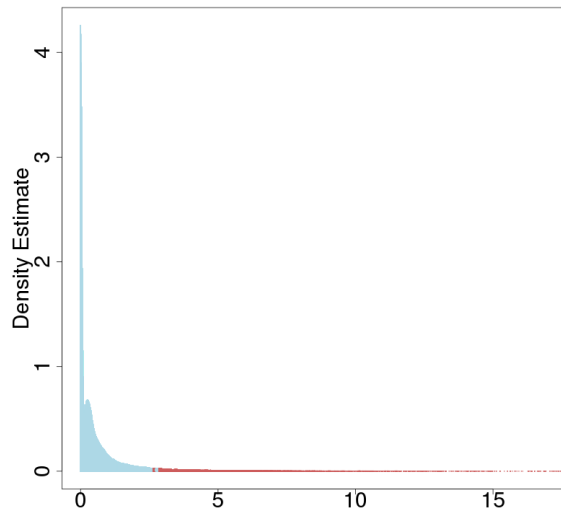

MX

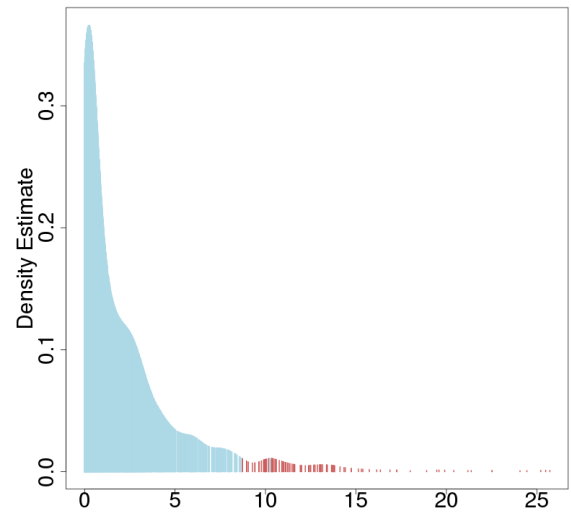

EM

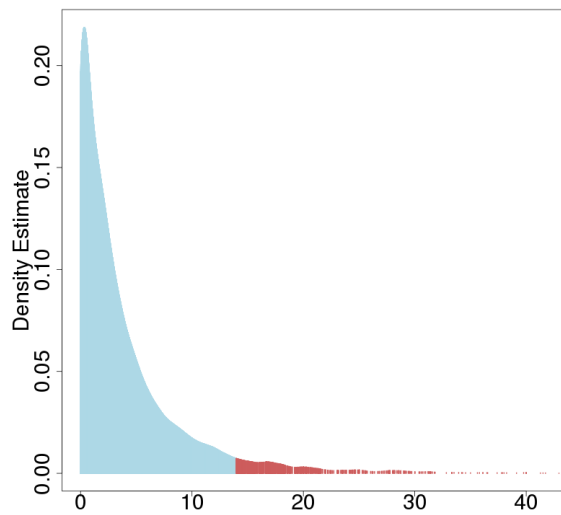

NMR



Figure S2d

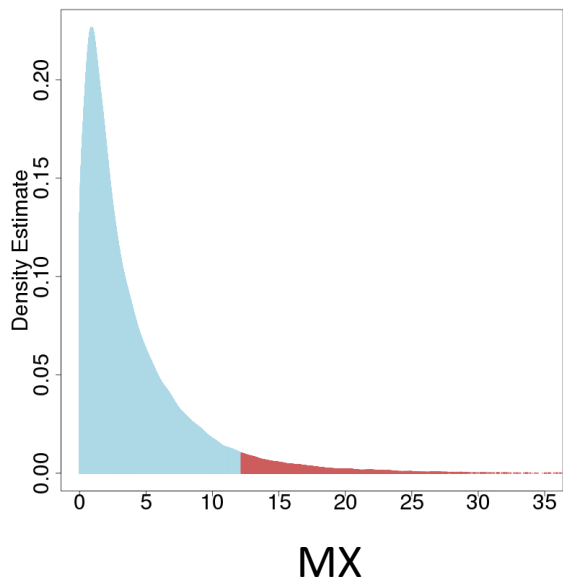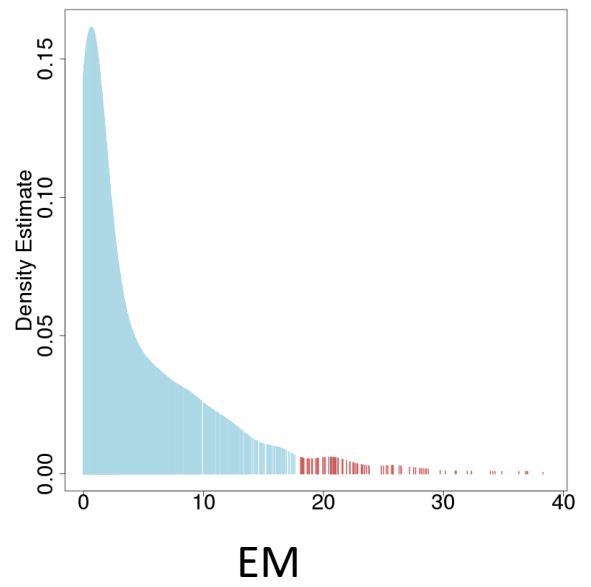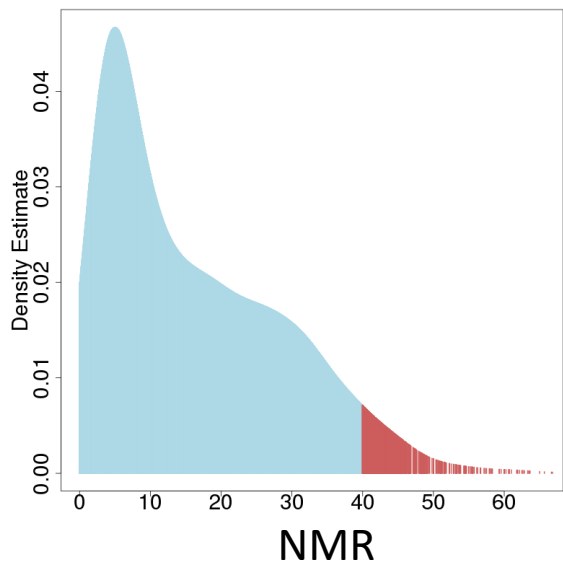

Figure S2e

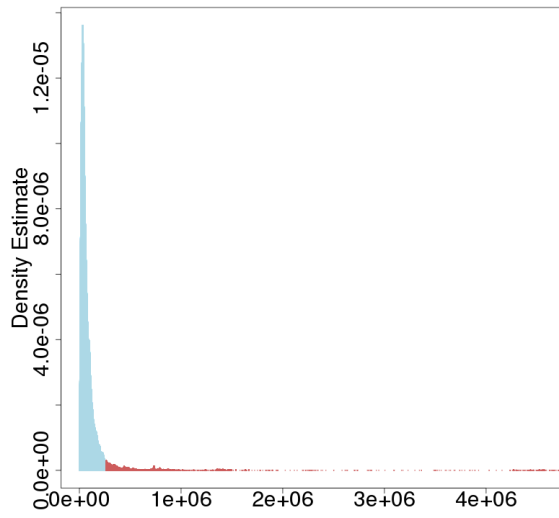

MX

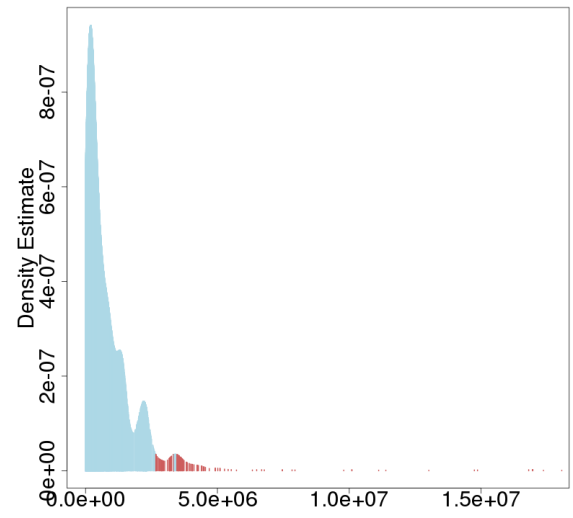

EM

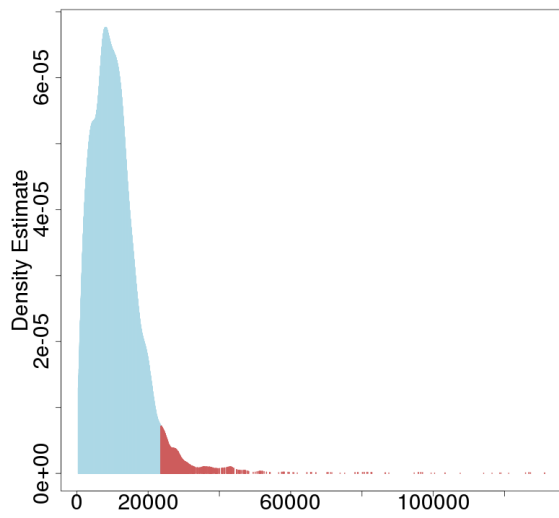

NMR

Figure S3: Probability density estimates based on different kernel bandwidth selections

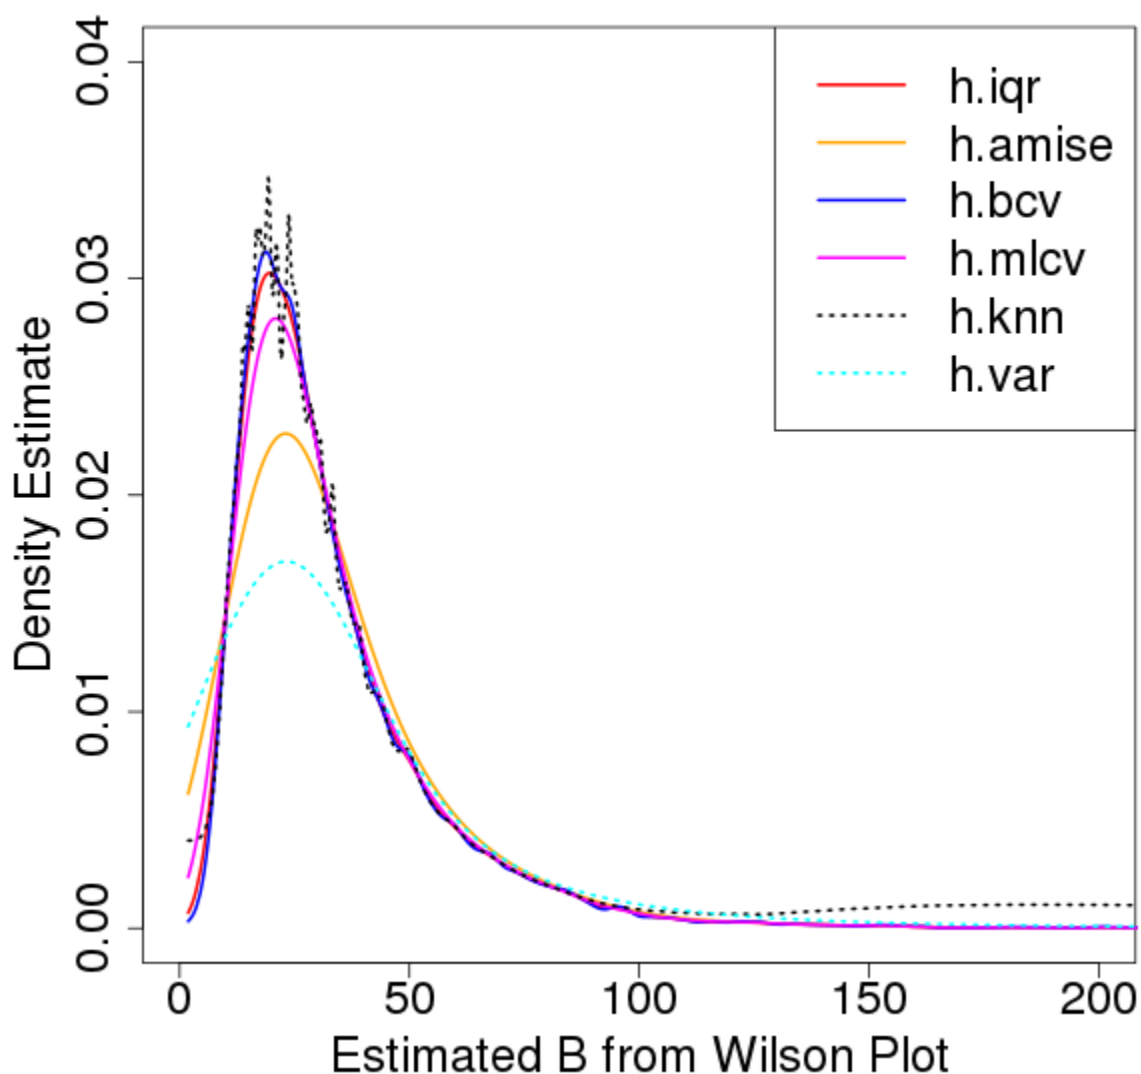

Data being displayed is the estimated isotropic B factor based on Wilson plot. Gaussian kernel is used by default with different bandwidths as indicated, except for kNN kernel that was based on Eq 3. Calculation was conducted on a sample of 10000 PDB X-ray entries from the archive. Solid colored lines for estimation from fixed-length kernel bandwidths and dotted lines from adaptive kernel bandwidths. Legend of Table S3 specifies methods to calculate each bandwidth.

Figure S4: Comparison of results from Gaussian and Uniform/Box kernels

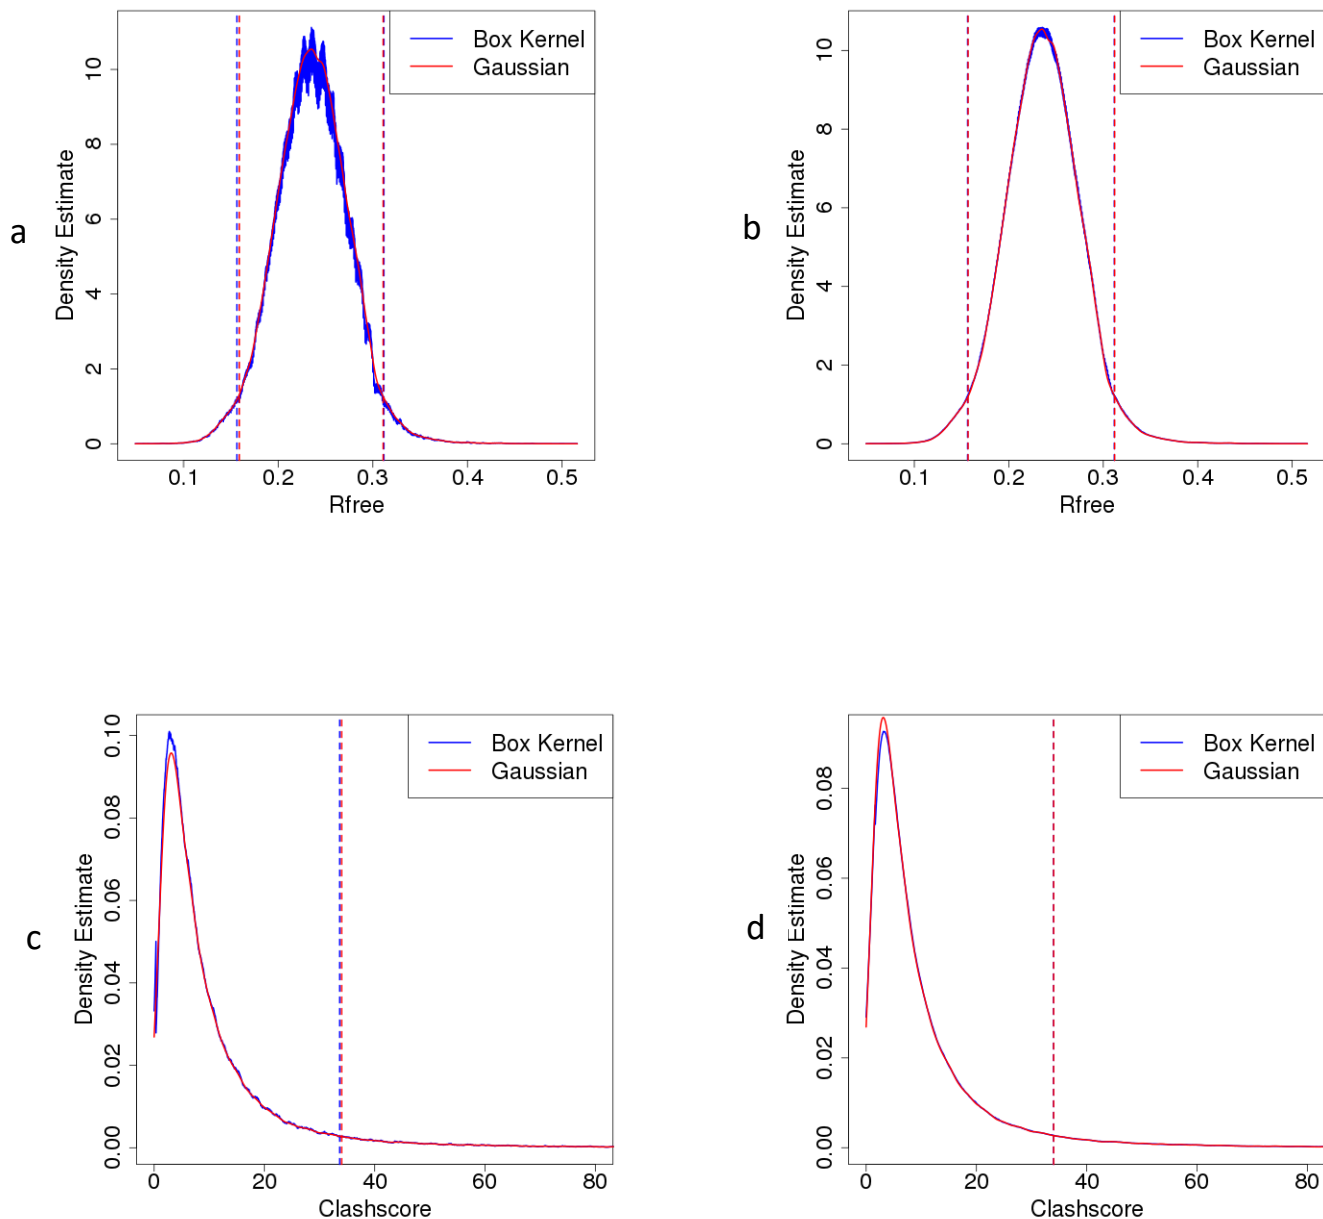

(a & b) Rfree and (c & d) Clashscore distribution overlay of probability density estimated by Uniform/Box kernel (blue) and Gaussian kernel (red). PDR outlier boundaries are also indicated by vertical dashed lines by Uniform kernel (blue) and Gaussian kernel (red). For all panels, Gaussian kernel estimates used bandwidths of  $h_{opt}$  based on Eq 2. Uniform kernel estimates used bandwidths of either  $h_{opt}$  (a & c) or  $5 \times h_{opt}$  (b & d). The high-level consistency makes it difficult to see lines of both colors at some regions of the distribution curves or at the outlier boundaries.
